# Supplementary material
Source: MDPI journal article supplement (https://www.mdpi.com/2073-445X/11/11/1955)
Supplement: s1 [file s1]

## **New\_Uruk\_Sites**

The data are represented in a shapefile and supporting files that represent the location, date, and approximate size of sites. The designation '1' indicates occupation for given periods.

SITE: The site number designation

N: The latitude in decimal degrees.

E: The longitude in decimal degrees.

UK: Uruk period

ED: Early Dynastic period

AK: Akkadian period

UR: Ur III period

OB: Isin/Larsa and Old Babylonian periods

KA: Kassite period

NB: Neo-Babylonian and early 1st millennium BCE.

ACH: Achaemenid period.

SL: Seleucid period

PA: Parthian period

SAS: Sasanian period

ISL: Islamic (early) period.

AREA: Area in hectares.
